# Hormone therapy and cognitive function

Pauline M. Maki<sup>1</sup> and Erin Sundermann

Neuropsychiatric Institute, MC 913, University of Illinois at Chicago, 912 South Wood Street, Chicago, IL 60612, USA

<sup>1</sup>Correspondence address. E-mail: pmaki@psych.uic.edu

## TABLE OF CONTENTS

- Introduction
- Part 1: Hormone therapy and verbal memory
  - Background
  - Methods
  - Results
  - Conclusions
- Part 2: Hormone therapy and executive functions
  - Background
  - Narrative review
  - Discussion
- General discussion

**BACKGROUND:** Clinical trials yield discrepant information about the impact of hormone therapy on verbal memory and executive function. This issue is clinically relevant because declines in verbal memory are the earliest predictor of Alzheimer's disease and declines in executive function are central to some theories of normal, age-related changes in cognition.

**METHODS:** We conducted a systematic review of randomized clinical trials of hormone therapy (i.e. oral, transdermal, i.m.) and verbal memory, distinguishing studies in younger (i.e.  $\leq 65$  years of age;  $n = 9$ ) versus older (i.e.  $> 65$  years;  $n = 7$ ) women and studies involving estrogen alone versus estrogen plus progestogen. Out of 32 placebo-controlled trials, 17 were included (13 had no verbal memory measures and 2 involved cholinergic manipulations). We also provide a narrative review of 25 studies of executive function (two trials), since there are insufficient clinical trial data for systematic review.

**RESULTS:** There is some evidence for a beneficial effect of estrogen alone on verbal memory in younger naturally post-menopausal women and more consistent evidence from small-n studies of surgically post-menopausal women. There is stronger evidence of a detrimental effect of conjugated equine estrogen plus medroxyprogesterone acetate on verbal memory in younger and older post-menopausal women. Observational studies and pharmacological models of menopause provide initial evidence of improvements in executive function with hormone therapy.

**CONCLUSIONS:** Future studies should include measures of executive function and should address pressing clinical questions; including what formulation of combination hormone therapy is cognitively neutral/beneficial, yet effective in treating hot flashes in the early post-menopause.

**Key words:** menopause / hormone therapy / cognition / estrogen / memory

## Introduction

This review is organized in two parts. The first is a systematic review of the effects of hormone therapy on verbal memory, as evidenced exclusively by findings from randomized, placebo-controlled, clinical

trials. For reasons discussed in detail below, this systematic review distinguishes trials in younger (i.e.  $< 65$  years of age) versus older post-menopausal women (i.e.  $> 65$  years of age) and distinguishes trials of estrogen alone versus trials of estrogen plus progestogen. The second part of the article is a narrative review, largely based on

findings from observational studies of hormone therapy and executive functions, a topic that has not been sufficiently investigated in clinical trials. We conclude from the first part of the review that there is some evidence for a beneficial effect of estrogen alone therapy on verbal memory in younger post-menopausal women and more consistent evidence from small-n studies of surgically post-menopausal women. We further conclude that there is strong evidence of a detrimental effect of combined estrogen and progestogen therapy, particularly conjugated equine estrogen plus medroxyprogesterone acetate (CEE/MPA), on verbal memory in older post-menopausal women. There is also evidence of a detrimental effect of combination CEE/MPA on verbal memory in younger women. We conclude from the second part of the review that there is sufficient evidence of improvements in executive function with hormone therapy to justify the routine inclusion of these outcome measures in future clinical trials of hormone therapy.

## Part I: Hormone therapy and verbal memory

### Background

The hypothesis that hormone therapy might protect against cognitive aging arose in large part from observational studies demonstrating a lower risk of Alzheimer's disease among women who had been treated with hormone therapy compared with those who had never been treated with hormone therapy. Meta-analyses of these observational studies suggested that a history of hormone therapy use decreased the risk of Alzheimer's disease by 29% (Yaffe *et al.*, 1998) to 34% (LeBlanc *et al.*, 2001). Most of the observational studies (i.e. 10 of 12 studies) were based on samples from the USA. Therefore, it is important to note certain characteristic patterns of hormone therapy use in the USA. The Third National Health and Nutrition Examination Survey indicated that 7% of women who used hormone therapy started therapy before they experienced natural or surgical menopause, 48% started therapy within a year after menopause, 10% started 2–4 years after menopause, and 25% started five or more years after menopause (Brett and Chong, 2001). In 1992, 90% of women who used hormone therapy were age 60 or younger (Wysowski *et al.*, 1995). The most frequent type of hormone therapy used was estrogen only therapy (Wysowski *et al.*, 1995; Brett and Madans, 1997). The most common form of estrogen therapy was CEE (Wysowski *et al.*, 1995). In 1992, 69% of women who had used hormone therapy indicated that they had used estrogen only hormone therapy, although only 31% had also used progestogen (Brett and Madans, 1997). Based on these patterns of usage, it is reasonable to assume that the large majority of women in the observational studies initiated estrogen only therapy (typically CEEs) early in life and stopped using hormone therapy after age 60. Thus, it is reasonable to assume that the hypothesis that hormone therapy protects against Alzheimer's disease was based on use of estrogen alone beginning in early post-menopause and stopping before age 60.

It is impractical to initiate a randomized trial in early post-menopausal women (assuming an average age of menopause of 51.4 years) and follow them prospectively until they reach an age,

typically a minimum of 65 years, when they are at increased risk for Alzheimer disease. Such an investigation would require a minimum of a 15-year follow-up. The practical solution to this challenge is to conduct a clinical trial in women, who are currently at increased risk for Alzheimer disease, that is, women who are at minimum 65 years of age. The Women's Health Initiative Memory Study (WHIMS) did exactly that, and specifically investigated the impact of CEE in women with prior hysterectomy over age 65 and the impact of CEE/MPA in naturally post-menopausal women over age 65 (Shumaker *et al.*, 2003, 2004). Each of the two trials was stopped prematurely. Although Alzheimer disease was the *a priori* primary outcome of interest (Shumaker *et al.*, 1998), all-cause dementia became the default primary outcome because of the lack of a sufficient number of Alzheimer cases. In a sample of 2947 post-menopausal women with prior hysterectomy, there was no evidence that CEE lowered the risk of all-cause dementia; the effects were statistically neutral [Hazard Ratio (HR) = 1.49, 95th percentile confidence interval (95% CI) = 0.83–2.66] (Shumaker *et al.*, 2004). In a sample of 4532 naturally post-menopausal women, CEE/MPA doubled the risk for all-cause dementia [HR = 2.01, 95% CI = 2.05 (1.21–3.48)] (Shumaker *et al.*, 2003). Thus, far from supporting the view that hormone therapy protects against dementia, this study demonstrate that combination CEE/MPA substantially increases the risk for all-cause dementia.

This finding came as a surprise to many researchers because prior to WHIMS not a single observational study reported a significant increased risk in dementia with hormone therapy. However, findings from a prospective observational study from Cache County, published before WHIMS, found evidence that prior use of hormone therapy (i.e. typically when initiated early in the menopause) protected against Alzheimer disease, but current use of hormone therapy unless initiated more than 10 years earlier (i.e. on average before age 63) did not protect against Alzheimer's disease. Indeed, the point estimate (HR) for Alzheimer risk among women who were current users of hormone therapy for 3–10 years (i.e. who initiated on average between age 61 and 68) was 2.12, similar to WHIMS, whereas the point estimate was 0.55 among older women who were current users but began at younger ages (Zandi *et al.*, 2002). The authors concluded, 'A new finding in this study is an apparent limited window of time during which sustained hormone replacement therapy (HRT) exposure seems to reduce the risk of AD (p. 2128)'. A subsequent observational study demonstrated that oophorectomy before age 48, but not after age 48, is associated with an increased risk of Alzheimer's disease, and estrogen therapy can prevent this risk (Rocca *et al.*, 2007). A number of articles since the Women's Health Initiative (WHI) have raised the possibility that there is a critical window or period in which hormone therapy exerts cognitive benefits, and this window may be early in the menopausal transition and/or at younger ages (Resnick and Henderson, 2002; Sano *et al.*, 2002; Henderson, 2006; Maki, 2006).

Early basic science studies supported the biological plausibility that estrogen enhanced memory and the function of brain structures and systems subserving memory in young female animals (see McEwen *et al.* (1997) for a review). Included in these mechanisms of action were changes in the morphology and synaptic plasticity of the hippocampus (Woolley *et al.*, 1990, 1996; McEwen and Woolley, 1994; Woolley and McEwen, 1994), functional interactions with the

cholinergic and serotonergic system (Toran-Allerand *et al.*, 1992; Singh *et al.*, 1994; Bethea *et al.*, 1998; Pan *et al.*, 1999), and enhancements in hippocampal-dependent memory (Gibbs, 1999; Farr *et al.*, 2000). Importantly, the animal model typically used in basic science studies is ovariectomy, a model that best translates to abrupt withdrawal of ovarian steroid hormones following surgical menopause. Also, the model employed younger animals because of the lower cost associated with using younger animals and the lack of appreciation in the basic and clinical field of the potential importance of age.

When basic scientists began to explore the effects of early versus later initiation of hormone therapy on both memory performance and the brain systems that subservise memory, important age effects emerged (see Gibbs and Gabor (2003) and Adams and Morrison (2003) for reviews). For example, early initiation of estrogen alone or estrogen plus progestogen following ovariectomy enhanced performance on a hippocampal-task in female rats, but delaying treatment by 10 months led to no improvements on the task (Gibbs, 2000). In young female rats, estrogen reversed the memory impairment induced by disrupting cholinergic transmission, but in older female rats estrogen does not reverse this memory impairment (Markowska and Savonenko, 2002). A translational study in humans showed similar results: pretreatment with estradiol mitigated against declines in verbal memory following cholinergic suppression in younger, but not older, post-menopausal women (Dumas *et al.*, 2008). The complexity of estrogen actions in the brain is further exemplified by the discovery of non-genomic and synaptic estrogen receptors and the discovery that the brain produces estrogen (see Woolley (2007) for a review). Lastly, the complexity of combination estrogen plus progesterone on brain function is complicated by the discovery that certain forms of progesterone, particularly MPA, but not other progestogens, antagonizes the effects of estrogen on neural structures subserving memory, particularly the hippocampus (Nilsen and Brinton, 2002a, b, 2003). This evidence suggests that progestogen formulation may be an important determinant of the impact of combination therapy on hippocampally mediated functions such as verbal memory. The evidence also provides a rationale for exploring the impact of different estrogen/progestogen combination therapies on verbal memory. Thus, both timing of initiation and type of therapy may be critical determinants of the effects of hormone therapy on cognition and brain function.

Although basic science and clinical studies suggest a need to further investigate the critical window hypothesis, the challenge remains—how do we best test the critical window hypothesis in light of the impracticality of a definitive, 15-year clinical trial? One approach is to investigate the impact of hormone therapy on an outcome variable that predicts dementia later in life. Studies demonstrate that the ability to acquire and recall new verbal information is the best, and possibly the earliest, neuropsychological predictor of who will convert to Alzheimer's disease (Jacobs *et al.*, 1995; Linn *et al.*, 1995; Albert *et al.*, 2001; Tian *et al.*, 2003; Saxton *et al.*, 2004; Tierney *et al.*, 2005; Tabert *et al.*, 2006; Blacker *et al.*, 2007). This ability, commonly called 'verbal memory' in the hormone therapy literature, is labeled as 'episodic memory' in the cognitive literature. Verbal memory is commonly tested with neuropsychological measures including the California Verbal Learning Test. This test that involves the acquisition of a 16-item shopping list over a series of five trials (i.e. Trial 1–5), the immediate recall of the original shopping list after a single exposure to a different and 'distracting' shopping list (i.e. short delay free

recall) and the 20-min delayed recall of the original shopping list (i.e. long-delay free recall) (Delis *et al.*, 2000). Less challenging word list learning tests are sometimes given, including the word list test from the Consortium to Establish a Registry for Alzheimer's Disease, which involves three presentations of a 10-item world list and no distractor word list (Morris *et al.*, 1989). Other verbal memory tests come from the Wechsler Memory Scale Revised (Wechsler, 1987) and involve the immediate and delayed recall of a short story or paragraph from the Logical Memory subtest (hereafter called 'Paragraph Recall') or the immediate and delayed recall of related and unrelated word pairs from the Verbal Paired Associates subtest.

In addition to their utility in predicting who will develop Alzheimer's disease, verbal memory tests are relevant to the study of hormone therapy for other reasons. There is a sex difference in favor of women on this cognitive ability (Kramer *et al.*, 1988, 2003). Moreover, midlife women complain about lapses in verbal memory. In the Seattle Midlife Women's Health Study, of 230 women interviewed (mean age = 47 years), 62% reported an undesirable change in memory (Mitchell and Woods, 2001). Changes included difficulty recalling words or numbers, forgetting events and actions and difficulty concentrating. Women attributed these changes to stress, health and age rather than hormonal changes. In a follow-up analysis, complaints were more frequent in the early and middle transitional stages than in the late transition and post-menopausal stages (Woods *et al.*, 2000). Unfortunately, to date there are no prospective studies of objective memory across the menopausal transition, although results from Gail Greendale and her colleagues from the Study of Women's Health Across the Nation are forthcoming. There are prominent decreases in verbal memory that occur in the absence of pre-clinical or clinical dementia (Zelinski and Burnight, 1997; Davis *et al.*, 2003; Lamar *et al.*, 2003). In the present review, we therefore focus on the impact of hormone therapy on verbal memory not only because verbal memory predicts dementia risk later in life, but also because verbal memory shows an advantage in women compared with men, declines with normal aging, and is the subject of frequent complaint among peri- and post-menopausal women and older individuals.

## Methods

For the systematic review of clinical trials of hormone therapy and verbal memory, we carried out a literature search from 1966 to October 2008 through the PubMed database <http://www.ncbi.nlm.nih.gov/pubmed/>. We also consulted previous reviews. We selected only publications in the English language and used key words 'menopause', 'post-menopausal', 'peri-menopausal', 'women', 'hormone therapy', 'HRT', 'estrogen therapy', 'estrogen replacement therapy', 'clinical trial', 'memory' and 'cognition'. Electronic versions of the retrieved documents were printed and reviewed to determine whether the trial met the following inclusion criteria: (a) participants were peri-menopausal and/or post-menopausal women (i.e. no premenopausal women); (b) design was a randomized-controlled clinical trial with placebo as the comparator treatment; (c) outcome measures included an episodic verbal memory measure; and (d) study design did not include any pharmacological manipulation (e.g. leuprolide acetate or scopolamine).

In light of the predominance of the critical window hypothesis in the literature, we present a summary of studies as a function of mean age at randomization to hormone therapy, specifically dichotomizing studies based on whether the mean age is  $\leq 65$  years of age or  $> 65$  years of age. The justification for this age cut-off is based on the typical cut-off in cognitive studies in older adults, including the WHIMS (Shumaker *et al.*, 2003, 2004). In light of findings that MPA antagonizes the effects of estrogen on the hippocampus, we further separate the studies based on whether the treatment used was estrogen alone or estrogen in combination with progestogen.

## Results

A total of 32 articles were identified as placebo-controlled clinical trials of hormone therapy and cognitive function in peri- or post-menopausal women. Thirteen trials were excluded because they did not include a measure of verbal episodic memory (Vanhulle and Demol, 1976; Fedor-Freybergh, 1977; Ditkoff *et al.*, 1991; Goebel *et al.*, 1995; Polo-Kantola *et al.*, 1998; Duka *et al.*, 2000; Janowsky *et al.*, 2000; Saletu *et al.*, 2002; Hays *et al.*, 2003; Krug *et al.*, 2003; Rapp *et al.*, 2003b; Espeland *et al.*, 2004; Viscoli *et al.*, 2005), and two trials were excluded because the comparison of estrogen versus placebo was nested in pharmacological manipulations of scopolamine, mecamlamine and placebo (Dumas *et al.*, 2006, 2008). There were a total of 17 studies included in this systematic review.

Table I presents a summary of seven randomized, placebo-controlled trials of estrogen alone therapy on episodic verbal memory in samples of women with a mean age  $< 65$  years (Hackman and Galbraith, 1976; Sherwin, 1988b; Phillips and Sherwin, 1992; Shaywitz *et al.*, 2003; Dunkin *et al.*, 2005; Joffe *et al.*, 2006; LeBlanc *et al.*, 2007). Among the four positive studies, three were conducted in samples of surgically post-menopausal women (Hackman and Galbraith, 1976; Sherwin, 1988a; Phillips and Sherwin, 1992). Although positive, those three studies are limited by sample sizes of 50 women or less and a therefore a lack of replication in larger samples. Certain aspects of trial design may have limited the ability of the neutral studies to detect an effect of estrogen therapy on verbal memory. First, the sample sizes are small, ranging from 17 to 60 women, so the power to detect a significant effect in these studies is low. Second, one of those studies included only one of the standard measures of verbal memory from the California Verbal Learning Test, and omitted short- and long-delay free recall, which are sensitive to hormone effects in other studies (Maki *et al.*, 2001, 2007; Resnick *et al.*, 2006); however, that same study found that hormone therapy improved performance on a measure from the test that not typically reported but is reflective of executive function rather than verbal memory *per se* (Joffe *et al.*, 2006). As reviewed later in this article, such evidence provides a justification for including similar measures in future clinical trials. Third, a neutral study, the only crossover study, lasted only 21 days per participant, leading to significant practice effects over the short test–retest interval (Shaywitz *et al.*, 2003). To address that bias against detecting a significant estrogen effect, the authors conducted a between-subjects analysis during the first post-treatment session. In that analysis, estrogen was associated with improved verbal memory. Thus, although the study was ‘neutral’ when examining group differences in change from pre- to

post-treatment, the study was positive when controlling for practice effects. Fourth, one study included three testing sessions within an 8-week period of time (LeBlanc *et al.*, 2007); successive test sessions over such a short interval can increase carry-over (e.g. practice) effects and lessen the likelihood of observing a significant hormone effect (Maki, 2003). In summary, despite small sample sizes and design choices that can minimize the ability to detect a significant effect of estrogen therapy on verbal memory, these studies provide the rationale for the hypothesis that estrogen alone enhances verbal memory in younger women, particularly those who are surgically post-menopausal.

Table II presents a summary of randomized, placebo-controlled trials of combined estrogen plus progestogen therapy on cognitive function in samples of women with a mean age  $< 65$  years (Linzmayr *et al.*, 2001; Maki *et al.*, 2007). Only one trial to date directly compared estrogen alone (e.g. estradiol valerate) versus estrogen plus progestogen (e.g. estradiol valerate plus dienogest) versus placebo (Linzmayr *et al.*, 2001). Combined hormone therapy enhanced associative verbal memory compared with both placebo and estradiol. The largest study to date ( $n = 180$ ) of any form of hormone therapy on verbal memory in women younger than age 65 was the Cognitive Complaints in Early Menopause Trial (Maki *et al.*, 2007) and included women (mean age 52) with cognitive complaints at baseline. Results indicated a trend ( $P < 0.07$ ) for CEE/MPA to decrease both short- and long-delay free recall compared with placebo. In summary, these two studies suggest that different forms of progestogen may have different effects on cognitive function, with negative effects of MPA on verbal memory and positive effects of dienogest, a progestin with anti-androgenic effects that is used primarily in Germany.

The top of Table III presents a summary of randomized, placebo-controlled trials of estrogen alone therapy on episodic verbal memory in samples of women with a mean age of more than 65 years (Wolf *et al.*, 1999; Schiff *et al.*, 2005; Almeida *et al.*, 2006; Yaffe *et al.*, 2006). To date, there are four trials, each with a different estradiol formulation. Results from each of these studies show neutral effects. Notably, the largest of these, a study involving 417 women (mean age 66.7 years) showed no negative impact, nor a trend toward a negative impact, of an ultra low-dose transdermal estradiol (0.14 mg/d) over a 2-year treatment interval. Importantly, no negative effects were observed on other cognitive outcomes in any of these four studies. Therefore, these studies suggest that certain formulations of estradiol can be initiated later in life without negative effects to verbal memory or other cognitive functions.

The bottom portion of Table III presents a summary of randomized, placebo-controlled trials of combined estrogen plus progestogen therapy on cognitive function in samples of women with a mean age older than 65 years (Binder *et al.*, 2001; Grady *et al.*, 2002; Resnick *et al.*, 2006; Pefanco *et al.*, 2007). Three of these four trials showed either a negative effect (Resnick *et al.*, 2006; Pefanco *et al.*, 2007) or a trend ( $P < 0.06$ ) for a negative effect of hormone therapy on verbal memory (Grady *et al.*, 2002). Two of these trials, Heart and Estrogen/progestin Replacement Study and WHI Study of Cognitive Aging (WHISCA), involved large sample sizes (e.g. 1328 and 1416), a similar dose of hormone therapy (e.g. 0.625 mg CEE plus 2.5 mg MPA) and a follow-up of more than 1 year (Grady *et al.*, 2002; Resnick *et al.*, 2006), and both found a negative impact on memory

**Table 1** Randomized, placebo-controlled, clinical trials of estrogen alone and verbal memory in younger women

| Author (Year)                | N (All) Final ET/PI | Mean Age (SD or span) | Prior HT Use (%) | Menopausal Status/ menopausal symptoms/ years since menopause                                                                                                           | Design                          | Dur   | ET                                                                                   | Dose                                                                     | Test                                                                                                                                                                                                                                      | Results                                                                                |
|------------------------------|---------------------|-----------------------|------------------|-------------------------------------------------------------------------------------------------------------------------------------------------------------------------|---------------------------------|-------|--------------------------------------------------------------------------------------|--------------------------------------------------------------------------|-------------------------------------------------------------------------------------------------------------------------------------------------------------------------------------------------------------------------------------------|----------------------------------------------------------------------------------------|
| Hackman and Galbraith (1976) | (?)<br>18<br>9/9    | (29–68)               | ?                | Eight surgically menopausal patients/10 patients with symptoms (4 mild and 1 moderate in ET group)/Unknown yrs since menopause                                          | Parallel (2 grps)               | 6 m   | Cyclic Oral piperazine E1                                                            | 3 mg/d for 21 d (1.5 mg bid); 7 days off                                 | Total Score on the Guild Memory Test (Paragraph Recall, Paired Associates, Digits Forward and Backward, DSST)                                                                                                                             | ET > PI on total memory score                                                          |
| Sherwin (1988a, b)           | (53)<br>50          | 45.4                  | Likely none      | All surgical menopausal (BSO/TAH)/Likely symptomatic from hysterectomy following baseline assessment/No delay in intervention after surgical menopause                  | Crossover (4 grps) <sup>a</sup> | 3 m   | Monthly injections of E (IM E2/d), E-A (TE, E2 dienanthate, and E2 benzoate), A (TE) | E2 IM (10 mg); TE (150 mg), E2 (7.5 mg), E2 benzoate (1 mg); TE (200 mg) | Paragraph Recall                                                                                                                                                                                                                          | HT > PI                                                                                |
| Phillips and Sherwin (1992)  | (31)<br>19<br>10/9  | 48 (5)                | Likely none      | All surgical menopausal (BSO/TAH)/Likely symptomatic from hysterectomy following baseline assessment/No time delay in intervention after surgical menopause             | Parallel (2 grps)               | 2 m   | Monthly injections of E2                                                             | 10 mg/m                                                                  | Paragraph recall; Paired Associates                                                                                                                                                                                                       | ET > PI Immediate Paragraph recall; Immediate and Delayed Paired Associates            |
| Shaywitz et al. (2003)       | (60)<br>60<br>29/31 | 51.2 (32–64)          | 27%              | Post-menopausal/80% had menopausal symptoms/Est. 3 yrs post-menopausal                                                                                                  | Crossover                       | 21 d  | Continuous Oral CEE                                                                  | 1.25 mg/d,                                                               | Paragraph Recall; Paired Associates                                                                                                                                                                                                       | ET = PI <sup>b</sup>                                                                   |
| Dunkin et al. (2005)         | (26)<br>17<br>9/8   | 57.0 (7.2)            | 6%               | Post-menopausal, 13% surgically menopausal/Menopause symptoms unknown/ Approximately 8 years since menopause                                                            | Parallel (2 grps)               | 10 wk | Transdermal E2                                                                       | 0.1 mg E2/d                                                              | California Verbal Learning Test (Trials 1–5 total, short- and long-delay free recall, recognition); Paragraph Recall; Paired Associates                                                                                                   | ET = PI <sup>c</sup>                                                                   |
| Joffe et al. (2006)          | (52)<br>50<br>26/24 | 51.0 (3.8)            | 18%              | 18% Early Transition, 38% Late Transition, 40% Early Postmenopause, and 4% Hysterectomy without oopherectomy/62% with symptoms (30% mild, 14% moderate, 18% severe)/n/a | Parallel (2 grps)               | 3 m   | Transdermal E2                                                                       | 0.05 mg/d                                                                | California Verbal Learning Test (Trials 1–5, perseverative errors during verbal recall, proactive interference during verbal recall, verbal learning, retroactive memory) <sup>d</sup> ; Wechsler Memory Scale Verbal Memory <sup>e</sup> | ET > PI perseverative errors; Trend proactive interference ( $P < 0.07$ ) <sup>f</sup> |

Continued

**Table 1** *Continued*

| Author (Year)                | N (All) Final ET/PI | Mean Age (SD or span) | Prior HT Use (%) | Menopausal Status/ menopausal symptoms/ years since menopause                                   | Design            | Dur | ET          | Dose   | Test                                             | Results |
|------------------------------|---------------------|-----------------------|------------------|-------------------------------------------------------------------------------------------------|-------------------|-----|-------------|--------|--------------------------------------------------|---------|
| LeBlanc <i>et al.</i> (2007) | (37)<br>32<br>14/18 | 52.6<br>(0.64)        | ?                | last menstrual period between 3 and 36 months before enrollment/Average 4 daily hot flashes/n/a | Parallel (2 grps) | 2 m | Oral tablet | 2 mg/d | Paragraph Recall; Paired Associates <sup>g</sup> | ET = PI |

Abbreviations: a = androgen, BSO = bilateral salpingo oophorectomy, CEE = Conjugated Equine Estrogen, d = day, DSST = digit symbol substitution test, Dur = duration, E = estrogen, E-A = Estrogen and androgen, Est. = estimated, ET = Estrogen Therapy, EI = estrone, E2 = estradiol, E3 = estriol, grps = groups, HT = Hormone Therapy, IM = intramuscular, m = months, mg = milligrams, n/a = not applicable for perimenopausal women, PI = Placebo, SD = Standard Deviation, TAH = total abdominal hysterectomy, TE = testosterone enanthate, wk = week, yr = years.

Note: If mean years since menopause was not provided in article, value was estimated as difference between current age and average age of menopause = 51.

<sup>a</sup>Fifty-three subjects were originally recruited, nine dropped out, and six additional women were recruited into study. Here all three active treatment groups are combined in results, because they did not differ from one another.

<sup>b</sup>To examine effect of treatment independent of practice effects, secondary analyses focused on between-groups differences during first post-treatment testing session. That analysis revealed a benefit of hormone therapy over placebo.

<sup>c</sup>Trend toward heavier women benefiting more than lighter women from estrogen in terms of verbal memory processes.

<sup>d</sup>Standard California Verbal Learning Test outcomes (e.g. short delay recall, long delay recall) were not included in results.

<sup>e</sup>Immediate and delayed logical memory and paired associates from the Wechsler Memory Scale—Revised were not provided; instead summary indices were provided including Wechsler Verbal Memory (i.e. Logical Memory I × 2) and Delayed Recall (which combined visual and verbal memory). Thus, results are not comparable to other studies where individual test results are presented.

<sup>f</sup>Results interpreted as evidence of executive function enhancement rather than verbal memory enhancement.

<sup>g</sup>Testing three times over a 2-month period: baseline, 4 weeks, and 8 weeks.

**Table II** Randomized, placebo-controlled, clinical trials of estrogen plus progestins and verbal memory in younger women

| Author (Year)          | N (All)<br>Final HT/<br>PI             | Age (SD or span) | Prior use of HT | Menopausal status/<br>menopausal symptoms/years since menopause <sup>a</sup>                                                              | Design            | Dur      | HT                                             | Dose                     | Test                                                                                                                                   | Results                                                              |
|------------------------|----------------------------------------|------------------|-----------------|-------------------------------------------------------------------------------------------------------------------------------------------|-------------------|----------|------------------------------------------------|--------------------------|----------------------------------------------------------------------------------------------------------------------------------------|----------------------------------------------------------------------|
| Linzmayr et al. (2001) | (?)<br>49<br>16/<br>17/16 <sup>a</sup> | 57 (46–67)       | ?               | Post-menopausal at least 1 yr/<br>Insomnia sleep disorder and moderate to severe menopausal symptoms on Kupperman Index (> 15)/Est. 6 yrs | Parallel (3 grps) | 3<br>2 m | Arm 1=Oral<br>EV + dienogest; Arm 2 = EV alone | 2 mg + 3 mg/d;<br>2 mg/d | Common, Associative and Total Verbal memory (Grunberger)                                                                               | HT > PI = ET<br>associative verbal memory                            |
| Maki et al. (2007)     | (180)<br>158<br>78/80                  | 52 (3.4)         | 14 m on average | Post-menopausal at least 1 yr/50% symptomatic/21 m since last period                                                                      | Parallel (2 grps) | 2<br>4 m | Oral CEE + MPA                                 | 0.625 mg+2.5 mg/d        | California verbal learning test (trials 1–5, short- and long-delay free recall, long-delay free recall, recognition); paragraph recall | HT=PI; Trend<br>HT<PI (P < 0.07)<br>short and long-delay free recall |

Abbreviations: CEE = Conjugated Equine Estrogen, d = day, Dur = duration, Est. = estimated, EV = estradiol valerate, grp = group, HT = Hormone Therapy, m = months, mg = milligram, MPA = Medroxyprogesterone Acetate, PI = Placebo, SD = Standard Deviation, yr = year.  
 Note: Years since menopause was estimated as difference between age at testing and average age of menopause = 51.  
<sup>a</sup>Study included an estrogen plus progestogen, estrogen alone, and placebo group. Sample sizes are given in that order. Study also included an open-label arm after the RCT, but results are presented for blinded arm only.

for word lists. Notably, WHISCA participants were a subset of women in WHIMS, the large clinical trial that showed a doubling of the risk of dementia with CEE/MPA (Shumaker et al., 2003). Women with dementia were excluded from WHISCA, but the data nonetheless support the view that verbal memory measures may be a valid proxy when considering the effects of hormone therapy on dementia risk. A fourth study found a deleterious effect of micronized estradiol and progesterone on Paragraph Recall but not Paired Associates (Pefanco et al., 2007). Effects of this preparation on word list recall were not assessed. The only neutral trial in this group included only Paired Associates, so a negative impact on other, more sensitive verbal memory measures, cannot be ruled out (Binder et al., 2001). In summary, these data suggest a consistent detrimental effect of combination estrogen plus progesterone on word list memory and Paragraph Recall.

### Conclusions

In conclusion, a review of clinical trials of hormone therapy and verbal memory indicates modest support for a beneficial effect of estrogen alone therapy in women younger than age 65 and a detrimental effect of combination estrogen plus progestogen therapy in women older than age 65. There is also evidence of a detrimental effect of combination CEE/MPA on verbal memory in younger women. There is no evidence of a benefit or a risk to verbal memory with estrogen alone therapy in older women. This review suggests that the effects of hormone therapy on verbal memory appear to depend on the age at initiation and the use of progestogens. Thus, if one combines users of estrogen alone with users of estrogen plus progestogen into one general category, a true beneficial effect of estrogen alone on verbal memory may be missed.

Two large, ongoing clinical trials promise to shed important new insights into the effects of hormone therapy on cognitive function in younger and older post-menopausal women. The Kronos Early Estrogen Prevention Study (KEEPS) is a 5-year, multicenter clinical trial that will enroll 720 women aged 42–58 years who are within 36 months of their final menstrual period to yield three treatment groups of 150 completers each (total of 450 women). KEEPS participants will be randomized to receive: (1) oral CEE (0.45 mg daily) plus micronized progesterone (200 mg); (2) transdermal estradiol (50 mg per day) plus micronized progesterone; or (3) placebo (Harman et al., 2005). The second ongoing trial is the Early Versus Late Intervention Trial with Estradiol (ELITE) led by Howard Hodis of the University of California at Los Angeles. ELITE is a single-site clinical trial that will enroll a total of 504 post-menopausal women who are <6 years from menopause (early) versus 10 years or more from menopause (late) to receive either oral estradiol (1 mg daily) or a placebo. Women with a uterus will also use vaginal progesterone gel 4% (or a placebo gel) the last ten days of each month. Both KEEPS and ELITE examine verbal memory as a primary outcome, so both studies will shed new light on the effects of hormone therapy on verbal memory. Importantly, both studies focus on naturally menopausal women, so both studies will lend insights into the issue of whether the beneficial effects of estrogen on cognitive function observed in surgically menopausal women extend also to naturally menopausal women.

**Table III** Randomized, placebo-controlled, clinical trials of hormone therapy and verbal memory in older post-menopausal women

| Author (Year)                      | N (All) Final ET/PI        | Age (SD or span)             | Prior HT Use (%) | Menopausal status/<br>menopausal symptoms/years since menopause                                                      | Design               | Dur               | HT                                                           | Dose                                                               | Test                                                                                                        | Results                                                                                   |
|------------------------------------|----------------------------|------------------------------|------------------|----------------------------------------------------------------------------------------------------------------------|----------------------|-------------------|--------------------------------------------------------------|--------------------------------------------------------------------|-------------------------------------------------------------------------------------------------------------|-------------------------------------------------------------------------------------------|
| <i>Estrogen alone</i>              |                            |                              |                  |                                                                                                                      |                      |                   |                                                              |                                                                    |                                                                                                             |                                                                                           |
| Wolf et al. (1999)                 | (40) 38<br>21/17           | 68.7 (1)                     | ?                | 13 Hysterectomy (8 with BSO)/<br>Unknown symptoms but<br>presumably mostly asymptomatic/<br>17.4 yrs since menopause | Parallel (2<br>grps) | 2 wk              | Transdermal E2                                               | 0.1 mg/d                                                           | Word pair recall                                                                                            | ET = PI                                                                                   |
| Almeida et al. (2006)              | (115) 86<br>47/39          | 73.7 (3.8)                   | 38%              | All post-menopausal/?/29 yrs since<br>menopause                                                                      | Parallel (2<br>grps) | 20<br>wk          | Oral E2                                                      | 2 mg/d                                                             | California Verbal Learning<br>Test (Trials 1–5 and<br>long-delay recall)                                    | ET = PI                                                                                   |
| Yaffe et al. (2006)                | (417) 376<br>191/<br>185   | 60–80<br>66.7 (5.0)          | ?                | Intact uterus/16% with symptoms/<br>15.4 yrs since menopause                                                         | Parallel (2<br>grps) | 2 yrs             | Transdermal E2                                               | 0.014 mg/d                                                         | Paragraph Recall; Word<br>List Memory                                                                       | ET = PI                                                                                   |
| <i>Estrogen and progestogen</i>    |                            |                              |                  |                                                                                                                      |                      |                   |                                                              |                                                                    |                                                                                                             |                                                                                           |
| Binder et al. (2001)               | (67) 52<br>34/18           | 81 (75–<br>91)               | 33%              | 48% Hysterectomy/Presumably<br>asymptomatic, no depression/34 yr<br>since menopause                                  | Parallel (3<br>grps) | 9 m               | CEE alone in 59%;<br>CEE + cyclic MPA<br>in 41% <sup>a</sup> | 0.625 mg/d;<br>0.625 mg/<br>d + 5 mg/d for 13 d<br>at m 2, 5 and 8 | Paired Associates                                                                                           | No effect                                                                                 |
| Grady et al. (2002)                | (1328) 1163<br>517/<br>546 | 66.8 <sup>b</sup><br>(44–79) | 24%              | Intact uterus/Hot flushes in 15%, all<br>had coronary disease/18 yr since<br>menopause                               | Parallel (2<br>grps) | 4.2 yr            | CEE + MPA                                                    | 0.625 mg/<br>d + 2.5 mg/d                                          | CERAD Word List<br>Memory; Word List Recall                                                                 | Trend HT < PI<br>( <i>P</i> < 0.06) for Word<br>List Memory; HT = PL<br>for other measure |
| Resnick et al. (2006)              | (1416) 1320<br>690/<br>726 | 73.8<br>(65+)                | 22%              | All naturally menopausal/Moderate<br>to severe hot flushes in 5%/Est. 22<br>yrs since menopause                      | Parallel (2<br>grps) | 3 yr <sup>c</sup> | CEE + MPA                                                    | 0.625 mg/<br>d + 2.5 mg/d                                          | California Verbal Learning<br>Test (Trials 1–5 total,<br>short- and long-delay free<br>recall, recognition) | HT < PL for Trials 1–<br>5, short and long-delay<br>free recall                           |
| Pefanco et al. (2007) <sup>d</sup> | (57) 45<br>32/25           | 75.5 (5.5)                   | ?                | 32% Hysterectomy/?/24.5 yr                                                                                           | Parallel (2<br>grps) | 3 yr              | Micronized E2;<br>micronized P                               | 0.25 mg/d; 100 mg/<br>d for 2 wks every<br>6 m                     | Paired Associates;<br>Paragraph Recall                                                                      | HT < PL for<br>immediate Paragraph<br>Recall <sup>d</sup> ; HT = PL for<br>other measures |

Abbreviations: BSO = bilateral salpingo oophorectomy, CEE = Conjugated Equine Estrogen, CERAD = Consortium to Establish a Registry of Alzheimer's Disease, d = day, Dur = duration, Est. = estimated, ET = estrogen therapy, E2 = estradiol, grp = group, HT = Hormone Therapy, m = months, mg = milligram MPA = Medroxyprogesterone Acetate, P = progesterone, PI = Placebo, SD = Standard Deviation, wk = week, yr = year.

Note: If mean years since menopause was not provided in article, value was estimated as difference between current age and average age of menopause = 51.

<sup>a</sup>Note that 63% of women received estradiol alone, while 37% also received cyclic progesterone.

<sup>b</sup>Age at randomization; age at testing 71 ± 6 yrs.

<sup>c</sup>Testing began on average 3 years after randomization, and women were followed for a mean of 1.5 years.

<sup>d</sup>Both treatment groups increased after 3 months and decreased at 36 months, but the HT group performed lower than at baseline at 36 months.



## Part 2: Hormone therapy and executive functions

### Background

Earlier in this review, we described the rich array of translational research studies demonstrating that estrogen enhances the function and synaptic plasticity of the hippocampus. It is clear from functional neuroimaging studies in humans that performance on verbal memory tests depends on the integrity of the hippocampus (Nyberg *et al.*, 1996; Schacter and Wagner, 1999; Schacter *et al.*, 1999). Neuroimaging studies in post-menopausal women demonstrate that estrogen therapy enhances hippocampal function during performance of word list tasks (Resnick *et al.*, 1998; Maki and Resnick, 2000). The hippocampus shows the earliest neuropathology of Alzheimer's disease and appears decades before disease onset (Sandberg *et al.*, 2001). The critical window hypothesis would suggest that intervention with hormone therapy decades before disease onset prevents declines in verbal memory and lowers risk of Alzheimer's disease, but intervening later has no effect. These findings strongly implicate the hippocampus as a critical structure in any effects of early intervention with estrogen on the prevention of Alzheimer's disease and declines in verbal memory.

Next we review evidence from observational studies and pharmacological models of menopause in young women to underscore the need to look for estrogen effects beyond the hippocampus in order to fully understand how estrogen might impact verbal memory and other cognitive functions. This evidence suggests that estrogen appears to enhance memory in part through executive functions mediated by the prefrontal cortex. Executive functions encompass cognitive processes such as set-shifting, response inhibition, working memory, problem-solving, reasoning and behavioral monitoring (Baddeley, 1986; Miller and Cummings, 1999). Executive functions that aid encoding and retrieval in memory tasks involve the strategic implementation of complex encoding strategies and mnemonic devices and the strategic placement of stimuli into spatial and temporal contexts (Wheeler *et al.*, 1995; Stuss *et al.*, 1996). For example, on list learning tasks such as the California Verbal Learning Task, one of the strategies that enhances acquisition and recall of verbal items is to cluster items according to category (e.g. recalling all of the fruit items and then all of the items of clothing). Notably, females use this strategy more than males (Kramer *et al.*, 1988), and hormone therapy enhances clustering during word retrieval (Maki *et al.*, 2001). Unfortunately, with the exception of a few clinical trials, there is insufficient clinical trial data to evaluate the effects of hormone therapy on tests of executive function. For that reason, we will present a brief overview of the observational and experimental literature to justify the inclusion of a broader array of executive functions in future clinical trials.

Studies in humans and animals provide support for the biological plausibility that estrogen enhances function of the prefrontal cortex. Neuroimaging studies demonstrate enhancement not only of hippocampal function but also of prefrontal function during retrieval of words from memory (Resnick *et al.*, 1998; Maki and Resnick, 2001). The prefrontal cortex is one of the highest estrogen binding sites in the female brain, with estradiol concentrations in the prefrontal cortex being approximately two times higher compared with the

temporal lobe and seven times higher compared with the hippocampus (Bixo *et al.*, 1995). In female monkeys, estrogen increases spinophilin-immunoreactive spine number in the prefrontal cortex (Tang *et al.*, 2004). Ovariectomy decreases spine density in the prefrontal cortex of female rats (Wallace *et al.*, 2006). Cyclic estrogen therapy reduced the age-related decline observed on a test of spatial working memory that is mediated by the frontal lobes in female monkeys (Rapp *et al.*, 2003a). This estrogen-induced benefit was observed independent of delay and therefore was unrelated to the memory demands of the task, suggesting to the authors that estrogen was exerting beneficial effects on processes such as 'susceptibility to proactive interference and distractibility' (p. 5712) (Rapp *et al.*, 2003a). Neuroimaging studies in humans demonstrate a double dissociation between executive control processes (subserved by prefrontal cortex) and mnemonic processes (subserved by posterior brain regions) contributing to working memory performance (Postle *et al.*, 1999). Given the primacy of executive processes on tests of working memory and the reliance of such tests on prefrontal cortex, we include studies of working memory in our narrative review.

### Narrative review

#### *Evidence that estrogen decreases errors of executive function on verbal memory tests*

Use of hormone therapy has been associated with a decrease in false positive and perseverative errors, two types of errors in executive function that are common in patients with lesions in the frontal cortex (Miller and Cummings, 1999; Ramage *et al.*, 1999). False positive errors refer to the endorsement of non-target items (e.g. saying that you heard a word that was not previously presented), and perseverative errors reflect deficient response inhibition (e.g. a tendency to make the same error over time). An observational study in 19 'menopausal women' (mean age  $\approx$ 53; methods do not specify peri- or post-menopausal status) found significantly lower rates of false positive and perseverative errors on the California Verbal Learning Test in a group of hormone therapy users compared with non-users, but no difference in Paragraph Recall (Keenan *et al.*, 2001). Similarly, surgically post-menopausal women (mean age  $\approx$ 65) who had used long-term estrogen therapy showed fewer perseverative errors on the California Verbal Learning Test compared with controls (Norbury *et al.*, 2007). As shown in Table 1, in a randomized clinical trial involving 52 peri- or post-menopausal women (mean age = 51), those randomized to receive placebo for 12 weeks made more perseverative errors on the California Verbal Learning Test compared with those women who were randomized to receive estradiol (Joffe *et al.*, 2006).

#### *Evidence that estrogen improves source memory*

Results from another observational study suggested that estrogen may help to mitigate against age-related cognitive decline by maintaining cognitive functions mediated by the frontal lobes (Vegesin and Stern, 2007). That study focused on the frontal lobe hypothesis of aging, which suggests that normal age-related cognitive decline—as distinct from prodromal Alzheimer's disease—reflects changes in executive function that are mediated by the frontal lobes (Albert and Kaplan, 1980; Craik and Jennings, 1992; Dempster, 1992; Moscovitch and Winocur, 1992; Stuss *et al.*, 1996; West, 1996). The specific hypothesis under investigation was that aging and

estrogen effects would be greater for source memory (i.e. an executive function involving the recollection of the context in which an item was presented) compared with item memory (i.e. a hippocampal function involving memory for a specific item). Young, regularly cycling women (mean age  $\approx 21.5$ ) performed better on source and item memory compared with older, post-menopausal women (mean age = 69). Post-menopausal women treated with estrogen demonstrated better source memory scores compared with those not treated with estrogen, whereas no differences existed between groups in item memory performance. Results were interpreted as suggesting that estrogen enhanced prefrontal, but not hippocampal, function in these older women.

#### *Evidence that estrogen improves working memory and set-shifting*

In some observational studies, hormone therapy has been shown to enhance performance on certain tests of working memory and cognitive set-shifting. Working memory and cognitive set-shifting underlie many higher-order cognitive operations and rely on the integrity of dorsolateral prefrontal cortex (Berman *et al.*, 1997; D'Esposito *et al.*, 1999; Cabeza and Nyberg, 2000; Manoach *et al.*, 2003; Veltman *et al.*, 2003). An observational study of 73 younger post-menopausal women (mean age = 56) found evidence that hormone therapy enhanced performance on tests of working memory, but not Paragraph Recall (Duff and Hampson, 2000). Beneficial effects of estrogen have also been reported on the N-back, a widely used measure of working memory, and Trails B, a cognitive set-shifting measure in younger post-menopausal women (mean age = 53) (Keenan *et al.*, 2001). In a pharmacological model of menopause, estrogen suppression induced by leuprolide acetate was associated with a decrease in performance on the N-back and the Letter-Number Sequencing Task (a measure of working memory), but not the California Verbal Learning Test, in a sample of 25 premenopausal women (mean age = 36) compared with healthy controls (Grigorova *et al.*, 2006). There is also evidence that hormone therapy is associated with improved performance on the Wisconsin Card Sort Task, a test requiring abstract reasoning, problem solving, working memory, strategizing and mental shifting (Erickson *et al.*, 2007; Wegesin and Stern, 2007). These effects have been found in older women who had used short-term (<10 years) hormone therapy (mean age = 70) (Erickson *et al.*, 2007) and older women (mean age = 69) who had used estrogen therapy for a variable length of treatment (Wegesin and Stern, 2007). These results suggest an influence of estrogen on executive functions mediated by dorsolateral prefrontal cortex.

#### *Neuroimaging evidence that estrogen improves frontal lobe function*

Neuroimaging studies demonstrate that estrogen enhances function of the frontal lobe in women during cognitive challenges. Compared with six women randomized to receive placebo for 12 weeks, five women randomized to receive estradiol for 12 weeks showed greater frontal lobe activity during verbal and spatial working memory tasks (Joffe *et al.*, 2006). In a double-blind, randomized, placebo-controlled, crossover trial of 46 younger post-menopausal women (mean age = 50.8), estrogen therapy for 21 days enhanced left-hemisphere activation during verbal encoding and increased activity in the right superior frontal gyrus during verbal retrieval (Shaywitz *et al.*, 1999). This pattern of brain activation represents enhancement of the hemisphere

encoding/retrieval asymmetry effect, a pattern of frontal lobe activity typically observed in younger, but not older, adults during memory tasks. Each of these neurobiological differences between hormone therapy users and non-users was evident despite a lack of behavioral differences in performance, suggesting that neuroimaging techniques may detect effects of estrogen on the frontal lobes that are not yet apparent by behavioral measures.

A series of neuroimaging investigations demonstrated a clear relationship between estradiol and activation in the frontal cortex during successful verbal encoding in healthy premenopausal women undergoing pharmacological ovarian hormone suppression with leuprolide acetate (Craig *et al.*, 2007, 2008a, b). Hormone suppression led to decreased activation in left prefrontal cortex, anterior cingulate and medial frontal gyrus (Craig *et al.*, 2007). A subsequent investigation demonstrated that this effect was reversed when estradiol levels returned to normal, higher levels (Craig *et al.*, 2008a). Suppressing cholinergic function with the drug scopolamine led to a similar reduction in activation in left inferior frontal gyrus during verbal encoding, and the combination of estrogen suppression and cholinergic suppression led to dramatic decreases in activity in this area (Craig *et al.*, 2008b). The left inferior frontal gyrus is involved in semantic processes—that is, deep processing of the meaning of verbal material—suggesting that estrogen aids in the encoding of verbal information into memory.

Few studies have investigated the impact of estrogen plus progestogens versus estrogen alone on executive functions. In an early positron emission tomography study in premenopausal women, ovarian hormone suppression with leuprolide acetate attenuated the typical pattern of neural activity—activation in dorsolateral prefrontal cortex, inferior parietal cortex and inferior temporal cortex—during a modified version of the Wisconsin Card Sorting Task. 'Add-back' treatment with estrogen or progesterone reversed this effect. Estrogen add-back led to greater left hippocampal activation compared with progesterone add-back. An observational study ( $n = 65$ ) of older post-menopausal women (mean age = 65) compared performance on tests of verbal memory and executive function among women using estrogen only, women using estrogen plus progesterone and women using neither (Grigorova and Sherwin, 2006). There were no clinically meaningful differences between groups on any measure, except a minor increase in response time on the N-back test in the estrogen plus progesterone group, suggesting that progesterone delays processing time without influencing response accuracy. In the observational study described above where hormone therapy was associated with enhanced performance on tests of working memory and set shifting, but not Paragraph Recall, there were no differences in performance between women receiving estrogen alone and those receiving estrogen plus progesterone (Duff and Hampson, 2000). A similar finding was evident in the study examining the frontal lobe hypothesis of aging, such that hormone therapy was associated with enhanced executive function regardless of whether a woman was receiving estrogen alone or estrogen plus progestogen (Wegesin and Stern, 2007).

## Discussion

In summary, evidence from pharmacological models of menopause in premenopausal women, observational studies in post-menopausal

women, and a couple of randomized trials suggest a beneficial effect of estrogen on executive functions. These beneficial effects are evident on measures of verbal memory that reflect the implementation of executive strategies such as semantic encoding or semantic organization, as well as on errors of response inhibition and perseveration. Benefits are also evident on tests of executive function, including tests of working memory (e.g. N-back, letter number sequencing), problem solving (e.g. Wisconsin Card Sorting) and source memory. The observation that these effects occur in the absence of effects on verbal memory in some studies, indicates that in some circumstances the effects of estrogen on executive function are evident even when there are no effects on hippocampally mediated tasks. The centrality of declines in executive function to some theories of cognitive aging underscores the importance of broadening our understanding of hormone effects beyond the hippocampus and verbal memory.

## General discussion

Although ongoing clinical trials such as KEEPS and ELITE will contribute to our understanding of estrogen effects on verbal memory, substantial gaps in knowledge will remain. These gaps are a barrier to effective clinical practice. First, clinicians should aim to prescribe a formulation of combination estrogen plus progestogen therapy that is effective for hot flashes but neutral or beneficial to cognitive function. To date, there is no strong support that any estrogen plus progestogen combination that is widely used in clinical practice is neutral to verbal memory; rather, evidence suggests harm. The need for a direct comparison of estrogen plus various progestogens on cognitive function in early post-menopausal women is great. Like MPA, micronized progesterone, the progesterone formulation used in KEEPS, was associated with declines in verbal memory in older women (Pefanco *et al.*, 2007). MPA was also associated with declines in verbal memory in younger post-menopausal women (Maki *et al.*, 2007), suggesting that the negative impact of progestogen may be evident regardless of age at initiation. Second, clinicians face the reality that there is no clear definition of 'early intervention'. How early must intervention with estrogen be to confer benefits to verbal memory (as evidenced in four of seven clinical trials in women younger than age 65), and possibly to Alzheimer's disease? New evidence of a substantial risk for Alzheimer's disease among women who underwent oophorectomy before age 48 but not after that age (Rocca *et al.*, 2007) suggests that the critical window might begin in the perimenopause. Another related issue is whether the benefits to verbal memory observed in surgically menopausal women extend to naturally menopausal women, particularly asymptomatic women. There is evidence that objective (but not subjective) hot flashes relate to verbal memory dysfunction (Maki *et al.*, 2008), so some of the cognitive benefit derived from hormone therapy may relate to treatment of hot flashes. Third, how long must hormone therapy be used to confer benefits? The treatment length among the four positive clinical trials was 2–4 months. It is unknown how long any benefit might last following discontinuation. Observational data suggest that past use of hormone therapy for 3–10 years delays the onset of Alzheimer's disease (Zandi *et al.*, 2002). Fourth, clinicians must weigh the cognitive consequences of continuing hormone therapy in women who were early initiators. Can a woman who initiates early remain on therapy

without experiencing cognitive declines, or perhaps even experiencing cognitive benefits with continued use? None of the ongoing clinical trials will address the question of whether initiating hormone therapy early in the menopause and continuing therapy until after age 65 yields a positive or negative impact on verbal memory, Alzheimer's disease, or other critical cognitive functions. There is some evidence that the greatest risk reduction from Alzheimer's disease comes with longer duration of treatment (Tang *et al.*, 1996; Zandi *et al.*, 2002), but a clinical trial to address this issue is not feasible. The 'good' news is that Alzheimer's disease is very rare in women aged 50–60, so there is little evidence of an immediate negative impact of hormone therapy on risk for Alzheimer's disease.

It is important to emphasize that neither estrogen alone therapy nor estrogen plus progestogen therapy is indicated for the prevention or treatment of cognitive function. The focus on cognitive function is therefore relevant to women who use hormone therapy for other indications, primarily the treatment of menopausal symptoms. For this reason, any discussion of hormone therapy and cognitive function should take into account the possible medical risks of hormone therapy. Given that the focus in the present review is on the critical window hypothesis and women who initiated therapy closer to the menopause, it is helpful to review the medical risks associated with hormone therapy in this group and in particular in women less than 60 years of age (see van de Weijer (2008) for a review). Although clinical trial findings suggest that CEE/MPA is harmful to cognitive function, arguably the most comprehensive data on the medical risks of combined hormone therapy come from the WHI, so we will refer to those findings when discussing medical risks. A recent analysis of the risks of hormone therapy as a function of age in WHI found no cardiovascular risk with CEE alone or CEE/MPA in women younger than age 60; in fact, women who initiated hormone therapy closer to menopause (i.e. within 10 years) had reduced cardiovascular risk compared with the increase in coronary heart disease risk among women more distant from menopause ( $P < 0.02$ ) (Rossouw *et al.*, 2007). The effects of hormone therapy on overall mortality also tended to differ by age ( $P = 0.06$ ), with a significant reduction in overall mortality among women aged 50–59 (HR = 0.70, 95% CI = 0.51–0.96). Stroke was significantly increased among women who initiated hormone therapy closer to menopause (i.e. within 10 years), (HR = 1.77, 95% CI, 1.05–2.98), but after exclusion of women with prior cardiovascular disease the HR was 1.23 (non-significant). Breast cancer is a significant concern associated with HT therapy, but the HR associated with HT in the WHI among women aged 50–59 was non-significant (HR = 1.19, 95% CI, 0.84–1.70) (Rossouw *et al.*, 2007).

From a research point of view, the study of hormones and cognition faces several challenges. There is little evidence that estrogen enhances cognition; rather, in the four of seven positive trials estrogen was seen to maintain one's level of cognitive function. For example, in both surgical menopause and pharmacological models of menopause, estrogen suppression leads to deficits in verbal memory, and performance returns to baseline levels—not higher—following add-back estrogen (Sherwin, 1988b; Sherwin and Tulandi, 1996). The view of estrogen as a memory maintainer or protector rather than as a memory enhancer has important implications for research. First, the magnitude of normal, age-related declines in verbal memory in women in their 50s is very minimal. Second, the magnitude of the

practice effect, the amount of improvement from the first test session to the next, is substantial. Thus practice effects are likely to mask any more subtle effect of estrogen on cognitive function. For these two reasons, it is very challenging to detect a signal for estrogen benefits in peri-menopausal or early post-menopausal women. Two experimental approaches have been shown to be useful in overcoming these limitations. First, pharmacological models of memory declines induced by suppressing ovarian hormones and/or acetylcholine have been shown to be very sensitive to the effects of estrogen on cognition. Second, neuroimaging studies focusing on brain regions subserving memory function have been shown to be sensitive to estrogen effects even in the absence of behavioral change. If neuropsychological studies are to be conducted to test this hypothesis, then large samples sizes are needed to ensure sufficient power.

Continued research is necessary to fully evaluate the impact of hormone therapy on cognitive function and risk for Alzheimer's disease. In light of the issues described above, arguably the most important priority is for a randomized clinical trial directly comparing the effects of different estrogen/progestogen combination therapies on verbal memory and executive function in peri-menopausal/early menopausal women (i.e. within 5 years of the final menstrual period), with a minimum follow-up period of 3 months. Such a study is needed to determine which type of hormone therapy is most cognitively neutral/beneficial in naturally menopausal women who are likely to seek hormone therapy for the treatment of menopausal symptoms. Optimally, such a study would examine cognitive benefits in relation to improvements in hot flash symptoms, since objective hot flashes (i.e. measured with ambulatory skin conductance monitors) have been shown to relate to impairments in verbal memory (Maki et al., 2008).

## Funding

National Institutes of Health/National Center for Complementary and Alternative Medicine (1 K01AT002321-01) Botanical Menopausal Therapies Mechanisms of CNS Action.

## References

- Adams MM, Morrison JH. Estrogen and the aging hippocampal synapse. *Cereb Cortex* 2003;**13**:1271–1275.
- Albert MS, Kaplin E. Organic Implications of neuropsychological deficits in the elderly. In: Poon JLFLW, Cermak LS, Arenberg D, Thompson W (eds). *New Directions in Memory and Aging: Proceedings of the George A. Talland Memorial Conference*. Hillsdale, NJ: Erlbaum, 1980, 403–432.
- Albert MS, Moss MB, Tanzi R, Jones K. Preclinical prediction of AD using neuropsychological tests. *J Int Neuropsychol Soc* 2001;**7**:631–639.
- Almeida OP, Lautenschlager NT, Vasikaran S, Leedman P, Gelavis A, Flicker L. A 20-week randomized controlled trial of estradiol replacement therapy for women aged 70 years and older: effect on mood, cognition and quality of life. *Neurobiol Aging* 2006;**27**:141–149.
- Baddeley AD. *Working Memory* (trans.). New York: Oxford University Press, 1986.
- Berman KF, Schmidt PJ, Rubinow DR, Danaceau MA, Van Horn JD, Esposito G, Ostrem JL, Weinberger DR. Modulation of cognition-specific cortical activity by gonadal steroids: a positron-emission tomography study in women. *Proc Natl Acad Sci USA* 1997;**94**:8836–8841.
- Bethea CL, Pecins-Thompson M, Schutzer WE, Gundlach C, Lu ZN. Ovarian steroids and serotonin neural function. *Mol Neurobiol* 1998;**18**:87–123.
- Binder EF, Schechtman KB, Birge SJ, Williams DB, Kohrt WM. Effects of hormone replacement therapy on cognitive performance in elderly women. *Maturitas* 2001;**38**:137–146.
- Bixo M, Backstrom T, Winblad B, Andersson A. Estradiol and testosterone in specific regions of the human female brain in different endocrine states. *J Steroid Biochem Mol Biol* 1995;**55**:297–303.
- Blackler D, Lee H, Muzikansky A, Martin EC, Tanzi R, McArdle JJ, Moss M, Albert M. Neuropsychological measures in normal individuals that predict subsequent cognitive decline. *Arch Neurol* 2007;**64**:862–871.
- Brett KM, Madans JH. Use of postmenopausal hormone replacement therapy: estimates from a nationally representative cohort study. *Am J Epidemiol* 1997;**145**:536–545.
- Brett K, Chong Y. *Hormone Replacement Therapy: Knowledge and Use in the United States*. Hyattsville, Maryland: National Center for Health Statistics, 2001.
- Cabeza R, Nyberg L. Neural bases of learning and memory: functional neuroimaging evidence. *Curr Opin Neurol* 2000;**13**:415–421.
- Craig MC, Fletcher PC, Daly EM, Rymer J, Cutter WJ, Brammer M, Giampietro V, Wickham H, Maki PM, Murphy DG. Gonadotropin hormone releasing hormone agonists alter prefrontal function during verbal encoding in young women. *Psychoneuroendocrinology* 2007;**32**:1116–1127.
- Craig MC, Fletcher PC, Daly EM, Rymer J, Brammer M, Giampietro V, Maki PM, Murphy DG. Reversibility of the effects of acute ovarian hormone suppression on verbal memory and prefrontal function in pre-menopausal women. *Psychoneuroendocrinology* 2008a.
- Craig MC, Fletcher PC, Daly EM, Rymer J, Brammer M, Giampietro V, Stahl D, Maki PM, Murphy DG. The interactive effect of the cholinergic system and acute ovarian suppression on the brain: An fMRI study. *Horm Behav* 2008b.
- Craik FIM, Jennings JM. *Human Memory* (trans.). Hillsdale, NJ: Erlbaum Associates, 1992.
- D'Esposito M, Postle BR, Ballard D, Lease J. Maintenance versus manipulation of information held in working memory: an event-related fMRI study. *Brain Cogn* 1999;**41**:66–86.
- Davis HP, Small SA, Stern Y, Mayeux R, Feldstein SN, Keller FR. Acquisition, recall, and forgetting of verbal information in long-term memory by young, middle-aged, and elderly individuals. *Cortex* 2003;**39**:1063–1091.
- Delis D, Kramer J, Kaplan E, Ober B. *California Verbal Learning Test. Adult Version Manual*, 2nd edn. (trans.) San Antonio, TX: Psychological Corporation, Harcourt-Brace, 2000.
- Dempster FN. The rise and fall of the inhibitory mechanism: toward a unified theory of cognitive development and aging. *Dev Rev* 1992;**12**:45–75.
- Ditkoff EC, Crary WG, Cristo M, Lobo RA. Estrogen improves psychological function in asymptomatic postmenopausal women. *Obstet Gynecol* 1991;**78**:991–995.
- Duff SJ, Hampson E. A beneficial effect of estrogen on working memory in postmenopausal women taking hormone replacement therapy. *Horm Behav* 2000;**38**:262–276.
- Duka T, Tasker R, McGowan JF. The effects of 3-week estrogen hormone replacement on cognition in elderly healthy females. *Psychopharmacology (Berl)* 2000;**149**:129–139.
- Dumas J, Hancur-Bucci C, Naylor M, Sites C, Newhouse P. Estrogen treatment effects on anticholinergic-induced cognitive dysfunction in normal postmenopausal women. *Neuropsychopharmacology* 2006;**31**:2065–2078.

- Dumas J, Hancur-Bucci C, Naylor M, Sites C, Newhouse P. Estradiol interacts with the cholinergic system to affect verbal memory in postmenopausal women: evidence for the critical period hypothesis. *Horm Behav* 2008;**53**:159–169.
- Dunkin J, Rasgon N, Wagner-Steh K, David S, Altshuler L, Rapkin A. Reproductive events modify the effects of estrogen replacement therapy on cognition in healthy postmenopausal women. *Psychoneuroendocrinology* 2005;**30**:284–296.
- Erickson KI, Colcombe SJ, Elavsky S, McAuley E, Korol DL, Scalf PE, Kramer AF. Interactive effects of fitness and hormone treatment on brain health in postmenopausal women. *Neurobiol Aging* 2007;**28**:179–185.
- Espeland M, Rapp S, Shumaker S, Brunner R, Manson J, Sherwin B, Hsia J, Margolis K, Hogan P, Wallace R *et al*. Conjugated equine estrogens and global cognitive function in postmenopausal women: Women's Health Initiative Memory Study. *JAMA* 2004;**291**:2959–2968.
- Farr SA, Banks WA, Morley JE. Estradiol potentiates acetylcholine and glutamate-mediated post-trial memory processing in the hippocampus. *Brain Res* 2000;**864**:263–269.
- Fedor-Freybergh P. The influence of oestrogens on the wellbeing and mental performance in climacteric and postmenopausal women. *Acta Obstetrica Gynecologica Scandinavica* 1977;**64**:1–91.
- Gibbs RB. Estrogen replacement enhances acquisition of a spatial memory task and reduces deficits associated with hippocampal muscarinic receptor inhibition. *Horm Behav* 1999;**36**:222–233.
- Gibbs RB. Long-term treatment with estrogen and progesterone enhances acquisition of a spatial memory task by ovariectomized aged rats. *Neurobiol Aging* 2000;**21**:107–116.
- Gibbs RB, Gabor R. Estrogen and cognition: applying preclinical findings to clinical perspectives. *J Neurosci Res* 2003;**74**:637–643.
- Goebel JA, Birge SJ, Price SC, Hanson JM, Fishel DG. Estrogen replacement therapy and postural stability in the elderly. *Am J Otol* 1995;**16**:470–474.
- Grady D, Yaffe K, Kristof M, Lin F, Richards C, Barrett-Connor E. Effect of postmenopausal hormone therapy on cognitive function: the Heart and Estrogen/progestin Replacement Study. *Am J Med* 2002;**113**:543–548.
- Grigorova M, Sherwin BB. No differences in performance on test of working memory and executive functioning between healthy elderly postmenopausal women using or not using hormone therapy. *Climacteric* 2006;**9**:181–194.
- Grigorova M, Sherwin BB, Tulandi T. Effects of treatment with leuprolide acetate depot on working memory and executive functions in young premenopausal women. *Psychoneuroendocrinology* 2006;**31**:935–947.
- Hackman BW, Galbraith D. Replacement therapy and piperazine oestrone sulphate ('Harmogen') and its effect on memory. *Curr Med Res Opin* 1976;**4**:303–306.
- Harman SM, Brinton EA, Cedars M, Lobo R, Manson JE, Merriam GR, Miller VM, Naftolin F, Santoro N. KEEPS: the Kronos Early Estrogen Prevention Study. *Climacteric* 2005;**8**:3–12.
- Hays J, Ockene J, Brunner R, Kotchen J, Manson J, Patterson R, Aragaki A, Shumaker S, Brzyski R, LaCroix A *et al*. Effects of estrogen plus progestin on health-related quality of life. *New Engl J Med* 2003;**348**:348.
- Henderson VW. Estrogen-containing hormone therapy and Alzheimer's disease risk: understanding discrepant inferences from observational and experimental research. *Neuroscience* 2006;**138**:1031–1039.
- Jacobs DM, Sano M, Doneief G, Marder K, Bell KL, Stern Y. Neuropsychological detection and characterization of preclinical Alzheimer's disease. *Neurology* 1995;**45**:957–962.
- Janowsky JS, Chavez B, Orwoll E. Sex steroids modify working memory. *J Cogn Neurosci* 2000;**12**:407–414.
- Joffe H, Hall JE, Gruber S, Sarmiento IA, Cohen LS, Yurgelun-Todd D, Martin KA. Estrogen therapy selectively enhances prefrontal cognitive processes: a randomized, double-blind, placebo-controlled study with functional magnetic resonance imaging in perimenopausal and recently postmenopausal women. *Menopause* 2006;**13**:411–422.
- Keenan PA, Ezzat WH, Ginsburg K, Moore GJ. Prefrontal cortex as the site of estrogen's effect on cognition. *Psychoneuroendocrinology* 2001;**26**:577–590.
- Kramer J, Delis D, Daniel M. Sex differences in verbal learning. *J Clin Psychol* 1988;**44**:907–915.
- Kramer J, Yaffe K, Lengenfelder J, Delis D. Age and gender interactions on verbal memory performance. *J Int Neuropsychol Soc* 2003;**9**:97–102.
- Krug R, Molle M, Dodt C, Fehm HL, Born J. Acute influences of estrogen and testosterone on divergent and convergent thinking in postmenopausal women. *Neuropsychopharmacology* 2003;**28**:1538–1545.
- Lamar M, Resnick SM, Zonderman AB. Longitudinal changes in verbal memory in older adults: distinguishing the effects of age from repeat testing. *Neurology* 2003;**60**:82–86.
- LeBlanc ES, Janowsky J, Chan BK, Nelson HD. Hormone replacement therapy and cognition: systematic review and meta-analysis. *JAMA* 2001;**285**:1489–1499.
- LeBlanc ES, Neiss MB, Carello PE, Samuels MH, Janowsky JS. Hot flashes and estrogen therapy do not influence cognition in early menopausal women. *Menopause* 2007;**14**:191–202.
- Linn RT, Wolf PA, Bachman DL, Knoefel JE, Cobb JL, Belanger AJ, Kaplan EF, D'Agostino RB. The 'preclinical phase' of probable Alzheimer's disease. A 13-year prospective study of the Framingham cohort. *Arch Neurol* 1995;**52**:485–490.
- Linzmayr L, Semlitsch HV, Saletu B, Bock G, Saletu-Zyhlharz G, Zoghalmi A, Gruber D, Metka M, Huber J, Oettel M *et al*. Double-blind, placebo-controlled psychometric studies on the effects of a combined estrogen-progestin regimen versus estrogen alone on performance, mood and personality of menopausal syndrome patients. *Arzneimittelforschung* 2001;**51**:238–245.
- Maki PM. Methodological pitfalls in the study of estrogen on cognition and brain function. In: Genazzani A (ed). *Hormone Replacement Therapy and Neurological Function*. Boca Raton, FL: CRC Press, 2003.
- Maki PM. Hormone therapy and cognitive function: is there a critical period for benefit? *Neuroscience* 2006;**138**:1027–1030.
- Maki PM, Resnick SM. Longitudinal effects of estrogen replacement therapy on PET cerebral blood flow and cognition. *Neurobiol Aging* 2000;**21**:373–383.
- Maki PM, Resnick SM. Effects of estrogen on patterns of brain activity at rest and during cognitive activity: a review of neuroimaging studies. *Neuroimage* 2001;**14**:789–801.
- Maki P, Zonderman A, Resnick S. Enhanced verbal memory in nondemented elderly women receiving hormone-replacement therapy. *Am J Psychiatry* 2001;**158**:227–233.
- Maki PM, Gast MJ, Vieweg AJ, Burriss SW, Yaffe K. Hormone therapy in menopausal women with cognitive complaints: a randomized, double-blind trial. *Neurology* 2007;**69**:1322–1330.
- Maki PM, Drogos LL, Rubin LH, Banuvar S, Shulman LP, Geller SE. Objective hot flashes are negatively related to verbal memory performance in midlife women. *Menopause* 2008;**15**:848–856.
- Manoach DS, Greve DN, Lindgren KA, Dale AM. Identifying regional activity associated with temporally separated components of working memory using event-related functional MRI. *Neuroimage* 2003;**20**:1670–1684.
- Markowska AL, Savonenko AV. Effectiveness of estrogen replacement in restoration of cognitive function after long-term estrogen withdrawal in aging rats. *J Neurosci* 2002;**22**:10985–10995.

- McEwen BS, Woolley CS. Estradiol and progesterone regulate neuronal structure and synaptic connectivity in adult as well as developing brain. *Exp Gerontol* 1994;**29**:431–436.
- McEwen BS, Alves SE, Bulloch K, Weiland NG. Ovarian steroids and the brain: implications for cognition and aging. *Neurology* 1997;**48**:S8–S15.
- Miller BL, Cummings JL. *The Frontal Lobes: Functions and Disorders* (trans.). New York: Guilford Press, 1999.
- Mitchell E, Woods N. Midlife women's attributions about perceived memory changes: observations from the Seattle Midlife Women's Health Study. *J Women's Health Gender Based Med* 2001;**10**:351–362.
- Morris JC, Heyman A, Mohs RC, Hughes JP, van Belle G, Fillenbaum G, Mellits ED, Clark C. The Consortium to Establish a Registry for Alzheimer's Disease (CERAD). Part I. Clinical and neuropsychological assessment of Alzheimer's disease. *Neurology* 1989;**39**:1159–1165.
- Moscovitch MW, Winocur G. The neuropsychology of memory and aging. In: Craik TASFIM (ed). *The Handbook of Aging and Cognition*. Hillsdale, NJ: Lawrence Erlbaum Associates, Inc., 1992, 315–372.
- Nilsen J, Brinton RD. Impact of progestins on estradiol-potentialiation of the glutamate calcium response. *Neuroreport* 2002a;**13**:825–830.
- Nilsen J, Brinton RD. Impact of progestins on estrogen-induced neuroprotection: synergy by progesterone and 19-norprogesterone and antagonism by medroxyprogesterone acetate. *Endocrinology* 2002b;**143**:205–212.
- Nilsen J, Brinton RD. Divergent impact of progesterone and medroxyprogesterone acetate (Provera) on nuclear mitogen-activated protein kinase signaling. *Proc Natl Acad Sci USA* 2003;**100**:10506–10511.
- Norbury R, Travis MJ, Erlandsson K, Waddington W, Ell PJ, Murphy DG. Estrogen therapy and brain muscarinic receptor density in healthy females: a SPET study. *Horm Behav* 2007;**51**:249–257.
- Nyberg L, McIntosh AR, Cabeza R, Habib R, Houle S, Tulving E. General and specific brain regions involved in encoding and retrieval of events: what, where, and when. *Proc Natl Acad Sci USA* 1996;**93**:11280–11285.
- Pan Y, Anthony M, Clarkson TB. Effect of estradiol and soy phytoestrogens on choline acetyltransferase and nerve growth factor mRNAs in the frontal cortex and hippocampus of female rats. *Proc Soc Exp Biol Med* 1999;**221**:118–125.
- Pefanco MA, Kenny AM, Kaplan RF, Kuchel G, Walsh S, Kleppinger A, Prestwood K. The effect of 3-year treatment with 0.25 mg/day of micronized 17beta-estradiol on cognitive function in older postmenopausal women. *J Am Geriatr Soc* 2007;**55**:426–431.
- Phillips SM, Sherwin BB. Effects of estrogen on memory function in surgically menopausal women. *Psychoneuroendocrinology* 1992;**17**:485–495.
- Polo-Kantola P, Portin R, Polo O, Helenius H, Irjala K, Erkkola R. The effect of short-term estrogen replacement therapy on cognition: a randomized, double-blind, cross-over trial in postmenopausal women. *Obstet Gynecol* 1998;**91**:459–466.
- Postle BR, Berger JS, D'Esposito M. Functional neuroanatomical double dissociation of mnemonic and executive control processes contributing to working memory performance. *Proc Natl Acad Sci USA* 1999;**96**:12959–12964.
- Ramage A, Bayles K, Helm-Estabrooks N, Cruz R. Frequency of perseveration in normal subjects. *Brain Lang* 1999;**66**:329–340.
- Rapp PR, Morrison JH, Roberts JA. Cyclic estrogen replacement improves cognitive function in aged ovariectomized rhesus monkeys. *J Neurosci* 2003a;**23**:5708–5714.
- Rapp SR, Legault C, Thal L, Wallace RB, Ockene JK, Hendrix SL, Jones BN 3rd, Assaf AR, Jackson RD, Kotchen JM et al. Effect of estrogen plus progestin on global cognitive function in postmenopausal women: the Women's Health Initiative Memory Study: a randomized controlled trial. *JAMA* 2003b;**289**:2651–2662.
- Resnick SM, Henderson VW. Hormone therapy and risk of Alzheimer disease: a critical time. *JAMA* 2002;**288**:288.
- Resnick SM, Maki PM, Golski S, Kraut MA, Zonderman AB. Estrogen effects on PET cerebral blood flow and neuropsychological performance. *Horm Behav* 1998;**34**:171–184.
- Resnick SM, Maki PM, Rapp SR, Espeland MA, Brunner R, Coker LH, Granek IA, Hogan P, Ockene JK, Shumaker SA. Effects of combination estrogen plus progestin hormone treatment on cognition and affect. *J Clin Endocrinol Metab* 2006
- Rocca WA, Bower JH, Maraganore DM, Ahlskog JE, Grossardt BR, de Andrade M, Melton LJ 3rd. Increased risk of cognitive impairment or dementia in women who underwent oophorectomy before menopause. *Neurology* 2007;**69**:1074–1083.
- Rossouw JE, Prentice RL, Manson JE, Wu L, Barad D, Barnabei VM, Ko M, LaCroix AZ, Margolis KL, Stefanick ML. Postmenopausal hormone therapy and risk of cardiovascular disease by age and years since menopause. *JAMA* 2007;**297**:1465–1477.
- Saletu B, Anderer P, Gruber D, Metka M, Huber J, Saletu-Zyhlarz GM. Hormone replacement therapy and vigilance: double-blind, placebo-controlled EEG-mapping studies with an estrogen-progesterone combination (Climodien, Lafamme) versus estrogen alone in menopausal syndrome patients. *Maturitas* 2002;**43**:165–181.
- Sandberg G, Stewart W, Smialek J, Troncoso JC. The prevalence of the neuropathological lesions of Alzheimer's disease is independent of race and gender. *Neurobiol Aging* 2001;**22**:169–175.
- Sano M, Bell K, Jacobs D. Cognitive effects of estrogens in women with cardiovascular disease: what we do not know. *Am J Med* 2002;**113**:612–613.
- Saxton J, Lopez OL, Ratcliff G, Dulberg C, Fried LP, Carlson MC, Newman AB, Kuller L. Preclinical Alzheimer disease: neuropsychological test performance 1.5 to 8 years prior to onset. *Neurology* 2004;**63**:2341–2347.
- Schacter DL, Wagner AD. Medial temporal lobe activations in fMRI and PET studies of episodic encoding and retrieval. *Hippocampus* 1999;**9**:7–24.
- Schacter DL, Curran T, Reiman EM, Chen K, Bandy DJ, Frost JT. Medial temporal lobe activation during episodic encoding and retrieval: a PET study. *Hippocampus* 1999;**9**:575–581.
- Schiff R, Bulpitt CJ, Wesnes KA, Rajkumar C. Short-term transdermal estradiol therapy, cognition and depressive symptoms in healthy older women. A randomized placebo controlled pilot cross-over study. *Psychoneuroendocrinology* 2005;**30**:309–315.
- Shaywitz SE, Shaywitz BA, Pugh KR, Fulbright RK, Skudlarski P, Menci WE, Constable RT, Naftolin F, Palter SF, Marchione KE et al. Effect of estrogen on brain activation patterns in postmenopausal women during working memory tasks. *JAMA* 1999;**281**:1197–1202.
- Shaywitz SE, Naftolin F, Zelterman D, Marchione KE, Holahan JM, Palter SF, Shaywitz BA. Better oral reading and short-term memory in midlife, postmenopausal women taking estrogen. *Menopause* 2003;**10**:420–426.
- Sherwin BB. Affective changes with estrogen and androgen replacement therapy in surgically menopausal women. *J Affect Disord* 1988a;**14**:177–187.
- Sherwin BB. Estrogen and/or androgen replacement therapy and cognitive functioning in surgically menopausal women. *Psychoneuroendocrinology* 1988b;**13**:345–357.
- Sherwin BB, Tulandi T. 'Add-back' estrogen reverses cognitive deficits induced by a gonadotropin-releasing hormone agonist in women with leiomyomata uteri. *J Clin Endocrinol Metab* 1996;**81**:2545–2549.
- Shumaker SA, Reboussin BA, Espeland MA, Rapp SR, McBee WL, Dailey M, Bowen D, Terrell T, Jones BN. The Women's Health

- Initiative Memory Study (WHIMS): a trial of the effect of estrogen therapy in preventing and slowing the progression of dementia. *Control Clin Trials* 1998;**19**:604–621.
- Shumaker S, Legault C, Rapp S, Thal L, Wallace R, Ockene J, Hendrix S, Jones B, Assaf A, Jackson R et al. Estrogen plus progestin and the incidence of dementia and mild cognitive impairment in postmenopausal women: the Women's Health Initiative Memory Study: a randomized controlled trial. *JAMA* 2003;**289**:2651–2662.
- Shumaker S, Legault C, Kuller L, Rapp S, Thal L, Lane D, Fillit H, Stefanick M, Hendrix S, Lewis C et al. Conjugated equine estrogens and incidence of probable dementia and mild cognitive impairment in postmenopausal women: Women's Health Initiative Memory Study. *JAMA* 2004;**291**:2947–2958.
- Singh M, Meyer EM, Millard WJ, Simpkins JW. Ovarian steroid deprivation results in reversible learning impairment and compromised cholinergic function in female Sprague-Dawley rats. *Brain Res* 1994;**644**:305–312.
- Stuss DT, Craik FI, Sayer L, Franchi D, Alexander MP. Comparison of older people and patients with frontal lesions: evidence from world list learning. *Psychol Aging* 1996;**11**:387–395.
- Tabert MH, Manly JJ, Liu X, Pelton GH, Rosenblum S, Jacobs M, Zamora D, Goodkind M, Bell K, Stern Y et al. Neuropsychological prediction of conversion to Alzheimer disease in patients with mild cognitive impairment. *Arch Gen Psychiatry* 2006;**63**:916–924.
- Tang M-X, Jacobs D, Stern Y, Marder K, Schofield P, Gurland B, Andrews H, Mayeux R. Effect of oestrogen during menopause on risk and age at onset of Alzheimer's disease. *Lancet* 1996;**348**:429–432.
- Tang Y, Janssen WG, Hao J, Roberts JA, McKay H, Lasley B, Allen PB, Greengard P, Rapp PR, Kordower JH et al. Estrogen replacement increases spinophilin-immunoreactive spine number in the prefrontal cortex of female rhesus monkeys. *Cereb Cortex* 2004;**14**:215–223.
- Tian J, Bucks RS, Haworth J, Wilcock G. Neuropsychological prediction of conversion to dementia from questionable dementia: statistically significant but not yet clinically useful. *J Neurol Neurosurg Psychiatr* 2003;**74**:433–438.
- Tierney MC, Yao C, Kiss A, McDowell I. Neuropsychological tests accurately predict incident Alzheimer disease after 5 and 10 years. *Neurology* 2005;**64**:1853–1859.
- Toran-Allerand CD, Miranda RC, Bentham WDL, Sohrabji F, Brown TJ, Hochberg RB, MacLusky NJ. Estrogen receptors colocalize with low-affinity nerve growth factor receptors in cholinergic neurons of the basal forebrain. *Proc Natl Acad Sci* 1992;**89**:4668–4672.
- van de Weijer PH. Risks of hormone therapy in the 50–59 year age group. *Maturitas* 2008;**60**:59–64.
- Vanhulle G, Demol R. A double-blind study into the influence of estril on a number of psychological tests in post-menopausal women. In: van Keep PA, Greenblatt RB, Albeaux-Fernet M (eds). *Consensus on the Menopause Research*. London: MTP Press, 1976, 94–99.
- Veltman DJ, Rombouts SA, Dolan RJ. Maintenance versus manipulation in verbal working memory revisited: an fMRI study. *Neuroimage* 2003;**18**:247–256.
- Viscoli CM, Brass LM, Kernan WN, Sarrel PM, Suissa S, Horwitz RI. Estrogen therapy and risk of cognitive decline: results from the Women's Estrogen for Stroke Trial (WEST). *Am J Obstet Gynecol* 2005;**192**:387–393.
- Wallace M, Luine V, Arellanos A, Frankfurt M. Ovariectomized rats show decreased recognition memory and spine density in the hippocampus and prefrontal cortex. *Brain Res* 2006;**1126**:176–182.
- Wechsler D. *Manual for the Wechsler Memory Scale-Revised* (trans.). San Antonio, TX: Psychological Corporation, 1987.
- Wegesin DJ, Stern Y. Effects of hormone replacement therapy and aging on cognition: evidence for executive dysfunction. *Neuropsychol Dev Cogn B Aging Neuropsychol Cogn* 2007;**14**:301–328.
- West RL. An application of prefrontal cortex function theory to cognitive aging. *Psychol Bull* 1996;**120**:272–292.
- Wheeler MA, Stuss DT, Tulving E. Frontal lobe damage produces episodic memory impairment. *J Int Neuropsychol Soc* 1995;**1**:525–536.
- Wolf OT, Kudielka BM, Hellhammer DH, Torber S, McEwen BS, Kirschbaum C. Two weeks of transdermal estradiol treatment in postmenopausal elderly women and its effect on memory and mood: verbal memory changes are associated with the treatment induced estradiol levels. *Psychoneuroendocrinology* 1999;**24**:727–741.
- Woods NF, Mitchell ES, Adams C. Memory functioning among midlife women: observations from the Seattle Midlife Women's Health Study. *Menopause* 2000;**7**:257–265.
- Woolley CS. Acute effects of estrogen on neuronal physiology. *Annu Rev Pharmacol Toxicol* 2007;**47**:657–680.
- Woolley CS, McEwen BS. Estradiol regulates hippocampal dendritic spine density via an N-methyl-D-aspartate receptor-dependent mechanism. *J Neurosci* 1994;**14**:7680–7687.
- Woolley CS, Gould E, Frankfurt M, McEwen BS. Naturally occurring fluctuation in dendritic spine density on adult hippocampal pyramidal neurons. *J Neurosci* 1990;**10**:4035–4039.
- Woolley CS, Wenzel HJ, Schwartzkroin PA. Estradiol increases the frequency of multiple synapse boutons in the hippocampal CA1 region of the adult female rat. *J Comp Neurol* 1996;**373**:108–117.
- Wysowski DK, Golden L, Burke L. Use of menopausal estrogens and medroxyprogesterone in the United States, 1982–1992. *Obstet Gynecol* 1995;**85**:6–10.
- Yaffe K, Sawaya G, Lieberburg I, Grady D. Estrogen therapy in postmenopausal women: Effects on cognitive function and dementia. *JAMA* 1998;**279**:688–695.
- Yaffe K, Vittinghoff E, Ensrud KE, Johnson KC, Diem S, Hanes V, Grady D. Effects of ultra-low-dose transdermal estradiol on cognition and health-related quality of life. *Arch Neurol* 2006;**63**:945–950.
- Zandi PP, Carlson MC, Plassman BL, Welsh-Bohmer KA, Mayer LS, Steffens DC, Brietner JCS. Hormone replacement therapy and incidence of Alzheimer's disease in older women: The Cache County Study. *JAMA* 2002;**288**:2123–2129.
- Zelinski EM, Burnight KP. Sixteen-year longitudinal and time lag changes in memory and cognition in older adults. *Psychol Aging* 1997;**12**:503–513.

Submitted on February 12, 2009; resubmitted on March 25, 2009; accepted on April 29, 2009
